# Supplementary material for: Fas signaling-mediated TH9 cell differentiation favors bowel inflammation and antitumor functions
Source: PubMed Central journal article supplement (PMC6606754; doi:10.1038/s41467-019-10889-4), 2019-07-02
Supplement: 41467_2019_10889_MOESM4_ESM.pdf [file 41467_2019_10889_MOESM4_ESM.pdf]

## **Description of Additional Supplementary Files**

File Name: Supplementary Data1

Description: RNA-sequencing analysis of differentially expressed genes in WT-T<sub>H</sub>9 and *Fas*<sup>lpr</sup>-T<sub>H</sub>9 in Fig. 2
